# Supplementary material for: MiRNA-99a directly regulates AGO2 through translational repression in hepatocellular carcinoma
Source: PubMed Central journal article supplement — Oncogenesis. 2014 Apr 14;3(4):e97–. doi: 10.1038/oncsis.2014.11 (PMC4007193; doi:10.1038/oncsis.2014.11), 2014-04-14

**Supplementary Table 1. Univariate and Multivariate Analysis of Factors Correlated with Tumor-free Survival.**

|                                 | Variable                           | Cases number         | HR (95% CI)         | P value             |       |
|---------------------------------|------------------------------------|----------------------|---------------------|---------------------|-------|
| <b>Univariate analysis</b>      | Age (year), >50: ≤50               | 71:81                | 0.919 (0.591-1.427) | 0.705               |       |
|                                 | Gender, male: female               | 123:29               | 0.515 (0.265-1)     | 0.05                |       |
|                                 | AFP (μg/L), >20: ≤20               | 97:54                | 1.661 (1.023-2.697) | 0.04*               |       |
|                                 | Serum bilirubin (μmol/L), >17: ≤17 | 38:114               | 1.446 (0.89-2.349)  | 0.136               |       |
|                                 | Serum albumin (g/L), >40: ≤40      | 114:38               | 1.321 (0.773-2.257) | 0.309               |       |
|                                 | ALT (U/L), >40: ≤40                | 63:89                | 1.758 (1.133-2.727) | 0.012*              |       |
|                                 | HBs antigen, positive: negative    | 118:34               | 1.516 (0.852-2.7)   | 0.157               |       |
|                                 | HBe antigen, positive: negative    | 46:106               | 1.006 (0.623-1.623) | 0.981               |       |
|                                 | Tumor size (cm), >5: ≤5            | 75:77                | 2.785 (1.738-4.464) | <0.001*             |       |
|                                 | Tumor number, single: multiple     | 107:45               | 2.184 (1.39-3.43)   | 0.001*              |       |
|                                 | Encapsulation, complete: no        | 78:74                | 0.578 (0.37-0.903)  | 0.016*              |       |
|                                 | Liver cirrhosis, with: without     | 114:38               | 1.618 (0.935-2.8)   | 0.086               |       |
|                                 | Differentiation, I+II: III+IV      | 52:100               | 2.277 (1.345-3.853) | 0.002*              |       |
|                                 | Microvascular invasion, yes: no    | 34:118               | 3.638 (2.275-5.815) | <0.001*             |       |
|                                 | TNM stage, I: II: III              | 60:42:50             | 1.716 (1.309-2.249) | <0.001*             |       |
|                                 | BCLC stage, A:B:C                  | 52:78:22             | 2.18 (1.55-1.55)    | <0.001*             |       |
|                                 | miR-99a, low: high                 | 111:41               | 0.435 (0.24-0.788)  | 0.006*              |       |
|                                 | <b>Multivariate analysis</b>       | AFP (μg/L), >20: ≤20 | 97:54               | 0.975 (0.56-1.697)  | 0.928 |
|                                 |                                    | ALT (U/L), >40: ≤40  | 63:89               | 1.267 (0.777-2.068) | 0.343 |
| Tumor size (cm), >5: ≤5         |                                    | 75:77                | 2.182 (1.245-3.823) | 0.006*              |       |
| Tumor number, single: multiple  |                                    | 107:45               | 1.181 (0.688-2.029) | 0.546               |       |
| Encapsulation, complete: no     |                                    | 78:74                | 0.837 (0.498-1.405) | 0.5                 |       |
| Differentiation, I+II: III+IV   |                                    | 52:100               | 1.273 (0.695-2.33)  | 0.435               |       |
| Microvascular invasion, yes: no |                                    | 34:118               | 2.458 (1.34-4.51)   | 0.004*              |       |
| TNM stage, I: II: III           |                                    | 60:42:50             | 1.094 (0.723-1.656) | 0.671               |       |
| BCLC stage, A:B:C               |                                    | 52:78:22             | 1.177 (0.7-1.979)   | 0.539               |       |
| miR-99a, low: high              |                                    | 111:41               | 0.443 (0.233-0.842) | 0.013*              |       |

**Supplementary Table 2. Univariate and Multivariate Analysis of Factors Correlated with Over-all Survival.**

|                                 | Variable                           | Cases number                       | HR (95% CI)         | P value             |       |
|---------------------------------|------------------------------------|------------------------------------|---------------------|---------------------|-------|
| <b>Univariate analysis</b>      | Age (year), >50: ≤50               | 71:81                              | 0.874 (0.536-1.426) | 0.59                |       |
|                                 | Gender, male: female               | 123:29                             | 0.522 (0.249-1.095) | 0.085               |       |
|                                 | AFP (μg/L), >20: ≤20               | 97:54                              | 1.801 (1.035-3.134) | 0.037*              |       |
|                                 | Serum bilirubin (μmol/L), >17: ≤17 | 38:114                             | 1.713 (1.018-2.885) | 0.043*              |       |
|                                 | Serum albumin(g/L), >40: ≤40       | 114:38                             | 1.141 (0.641-2.033) | 0.653               |       |
|                                 | ALT (U/L), >40: ≤40                | 63:89                              | 1.642 (1.009-2.672) | 0.046*              |       |
|                                 | HBs antigen, positive: negative    | 118:34                             | 1.556 (0.813-2.975) | 0.182               |       |
|                                 | HBe antigen, positive: negative    | 46:106                             | 1.211 (0.724-2.025) | 0.465               |       |
|                                 | Tumor size (cm), >5: ≤5            | 75:77                              | 2.881 (1.538-5.395) | 0.001*              |       |
|                                 | Tumor number, single: multiple     | 107:45                             | 2.484 (1.52-4.061)  | <0.001*             |       |
|                                 | Encapsulation, complete: no        | 78:74                              | 0.504 (0.304-0.834) | 0.008*              |       |
|                                 | Liver cirrhosis, with: without     | 114:38                             | 2.251 (1.147-4.419) | 0.018*              |       |
|                                 | Differentiation, I+II: III+IV      | 52:100                             | 2.881 (1.538-5.395) | 0.001*              |       |
|                                 | Microvascular invasion, yes: no    | 34:118                             | 4.719 (2.868-7.763) | <0.001*             |       |
|                                 | TNM stage, I: II: III              | 60:42:50                           | 1.795 (1.33-2.424)  | <0.001*             |       |
|                                 | BCLC stage, A:B:C                  | 52:78:22                           | 2.368 (1.625-3.452) | <0.001*             |       |
|                                 | miR-99a, low: high                 | 111:41                             | 0.405 (0.206-0.794) | 0.009*              |       |
|                                 | <b>Multivariate analysis</b>       | AFP (μg/L), >20: ≤20               | 97:54               | 0.912 (0.485-1.715) | 0.776 |
|                                 |                                    | Serum bilirubin (μmol/L), >17: ≤17 | 38:114              | 1.302 (0.711-2.384) | 0.393 |
| ALT (U/L), >40: ≤40             |                                    | 63:89                              | 0.97 (0.516-1.823)  | 0.924               |       |
| Tumor size (cm), >5: ≤5         |                                    | 75:77                              | 2.071 (1.067-4.02)  | 0.032*              |       |
| Tumor number, single: multiple  |                                    | 107:45                             | 1.119 (0.603-2.076) | 0.721               |       |
| Encapsulation, complete: no     |                                    | 78:74                              | 0.824 (0.452-1.504) | 0.528               |       |
| Liver cirrhosis, with: without  |                                    | 114:38                             | 2.224 (1.037-4.772) | 0.04*               |       |
| Differentiation, I+II: III+IV   |                                    | 52:100                             | 1.302 (0.711-2.384) | 0.393               |       |
| Microvascular invasion, yes: no |                                    | 34:118                             | 2.669 (1.351-5.276) | 0.005*              |       |
| TNM stage, I: II: III           |                                    | 60:42:50                           | 1.237 (0.778-1.967) | 0.37                |       |
| BCLC stage, A:B:C               | 52:78:22                           | 1.198 (0.671-2.139)                | 0.541               |                     |       |
| miR-99a, low: high              | 111:41                             | 0.433 (0.209-0.897)                | 0.024*              |                     |       |

Analysis was conducted on 152 HCC patients. Hazard ratios (95% confidence interval) and *p* values were calculated using univariate or multivariate Cox proportional hazards regression in SPSS 18.0. \* *P* < 0.05 by Cox proportional hazards regression.

Abbreviations: AFP, alpha-fetoprotein; ALT, alanine aminotransferase; CI, confidence interval; HR, hazard ratio; HBV, hepatitis B virus; TNM, tumor-node-metastasis.

**Supplementary Table 3. Sequence of primers used.**

| Gene         |                   | Primer Sequence (5'-3')   |
|--------------|-------------------|---------------------------|
| miR-99a      | Sense primer      | GCAACCCGTAGATCCGAT        |
| miR-21       | Sense primer      | GAGTGCTAGCTTATCAGACTGA    |
| let-7a       | Sense primer      | CATCGTGAGGTAGTAGGTTGT     |
| <i>Ago2</i>  | Sense primer      | TCCACCTAGACCCGACTTT       |
|              | Anti-sense primer | GTTCCACGATTTCCCTGTT       |
| <i>Pten</i>  | Sense primer      | CGGCAGCATCAAATGTTTCAG     |
|              | Anti-sense primer | AACTGGCAGGTAGAAGGCAACTC   |
| <i>U6</i>    | Sense primer      | GTGGACCGCACAAGCTCGCT      |
|              | Anti-sense primer | TTGTTGAACGGCACTGTGTATAGCA |
| <i>Gapdh</i> | Sense primer      | GGTGAAGGTCGGAGTCAACG      |
|              | Anti-sense primer | CAAAGTTGTCATGGATGHACC     |

**Supplementary Table 4. RNAi candidate target sequences for AGO2.**

| <b>Sequence name</b> | <b>Sequence (5'-3')</b> |
|----------------------|-------------------------|
| NS-siRNA             | TTCTCCGAACGTGTCACGT     |
| <i>Ago2</i> -Si1     | CGTCCGTGAATTTGGAATCAT   |
| <i>Ago2</i> -Si2     | CGGCAAGAAGAGATTAGCAAA   |
| <i>Ago2</i> -Si3     | GCACAGCCAGTAATCGAGTTT   |
| <i>Ago2</i> -Si4     | CAATCAAATTACAGGCCAATT   |
| <i>Ago2</i> -Si5     | CCAGATTTCAAACCTGGATTT   |

## Supplementary Figure Legend:

**Figure S1.** MiR-99a expression in HCC cell lines detected by qRT-PCR.

**Figure S2.** Restoration of miR-99a in HCC by the recombinant adenovirus expressing miR-99a *in vitro* (a) and *in vivo* (b). Cells transduced by Ad5-miR-99a or Ad-blank (empty adenovirus). Ctrl, untreated HCC cells. \*,  $P < 0.05$ ; \*\*,  $P < 0.01$ .

**Figure S3.** Necrotic areas detected by H&E staining in xenograft tissues.

**Figure S4.** *Ago2* expression in HCC cell lines detected by qRT-PCR (a) and Western blot. (b).

**Figure S5.** Knocked-down of *Ago2* by lentivirus-mediated RNAi. The interference efficiency of five candidate *Ago2*-siRNAs was examined in HEK-293T cells cotransfected with *Ago2* over-expressing vector. NC, cells treated by transfection reagent; Ctrl, cells cotransfected with *Ago2* over-expression vector and control vector expressing nonsilencing-siRNA; Si1-Si5, cells cotransfected with *Ago2* over-expression vector and control vector expressing *Ago2*-specific siRNA; Group 1, 0.6  $\mu$ g over-expression plasmid and 0.3  $\mu$ g siRNA plasmid was co-transfected; Group 2, 0.6  $\mu$ g over-expression plasmid and 0.6  $\mu$ g siRNA plasmid

**Figure S6.** Expression of miR-21a and let-7a in miR-99a over-expressing or *Ago2*-knockdown Huh7 cells (a) and Hep3B (b) cells as determined by qRT-PCR. Ad-blank and Ad5-miR-99a, HCC cells transduced by Ad-blank and Ad5-miR-99a, respectively. Ctrl and AGO2i, HCC cells stably expressing control siRNA and *Ago2*-specific siRNA, respectively. \*,  $P < 0.05$ ; \*\*,  $P < 0.01$ .

**Figure S7.** Expression of cancer-associated proteins in *Ago2*-knockdown Hep3B cells. GAPDH served as loading control. Ctrl and AGO2i indicated Hep3B cells stably expressing control siRNA and *Ago2*-specific siRNA, respectively. Ad5-miR-99a, the recombinant adenovirus expressing miR-99a; Ad-blank, the control adenovirus without transgene.

**Figure S8.** Expression of let-7a (a) and miR-21a (b) in HCC cell lines detected by qRT-PCR.

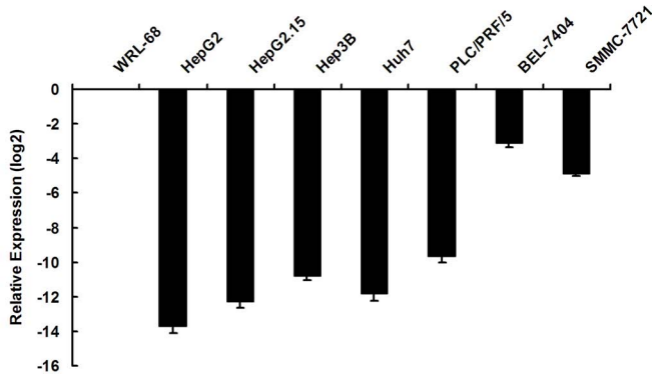

**a**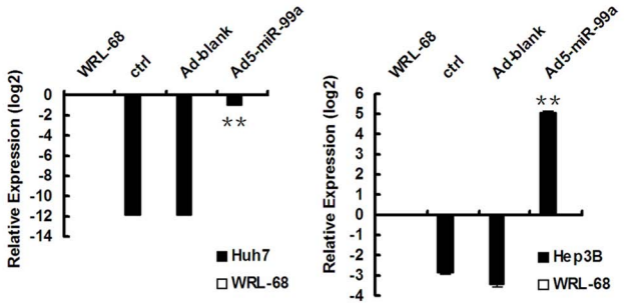**b**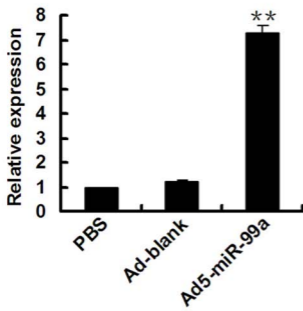

**Ad-blank**

**Ad5-miR-99a**

200x

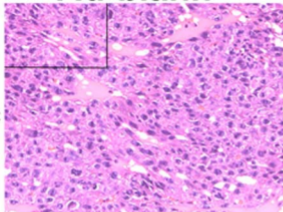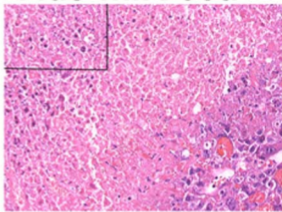

400x

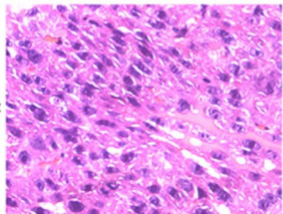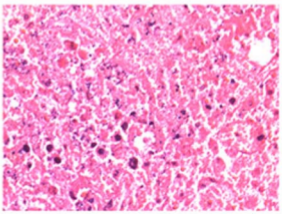



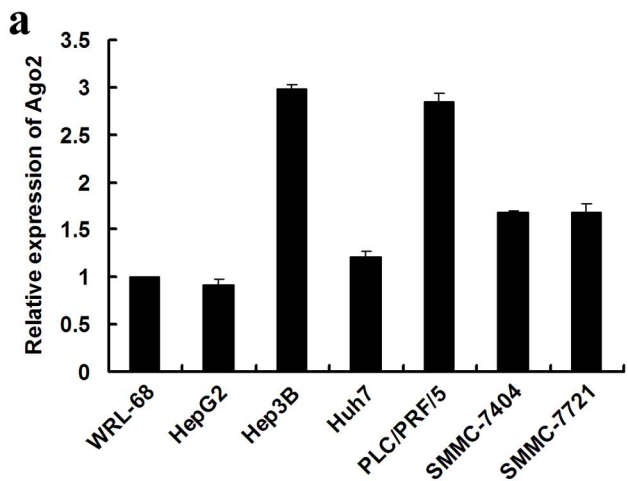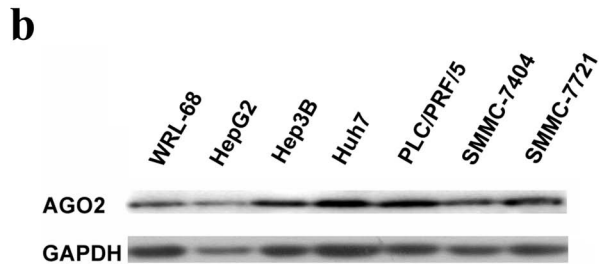

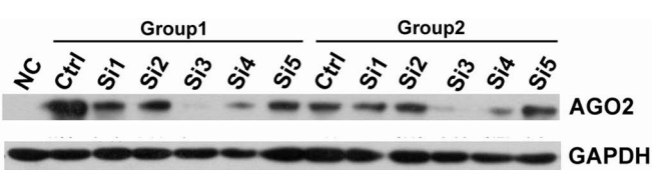

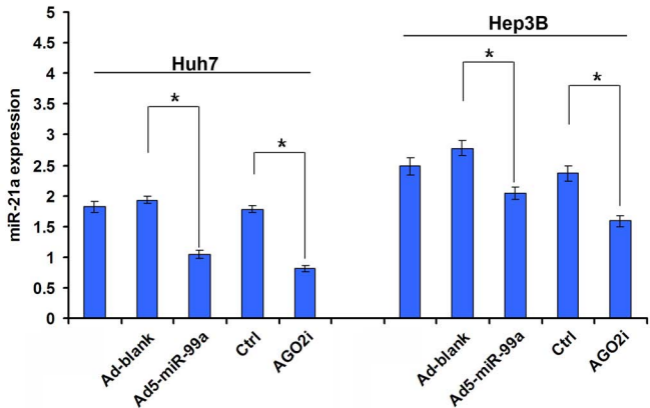

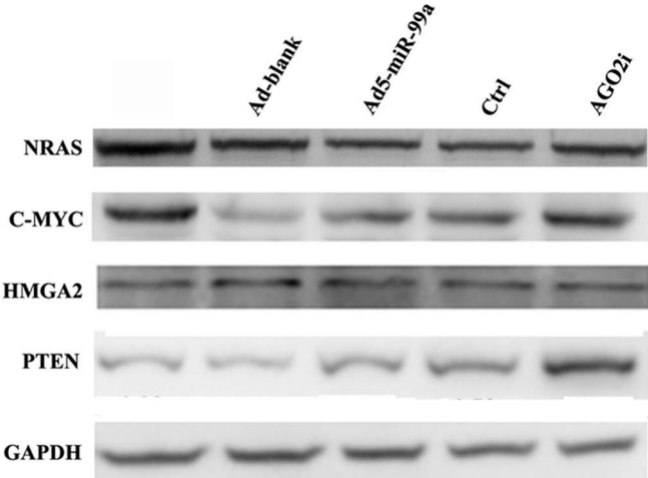

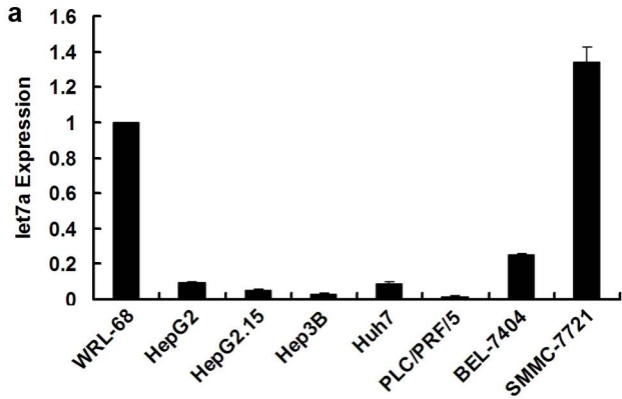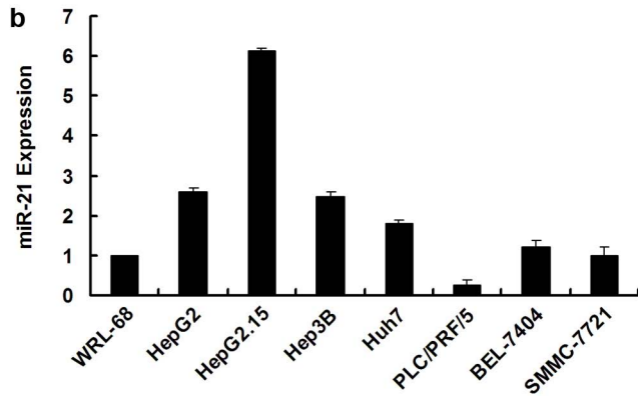

Supplement: oncsis201411x1.pdf [file oncsis201411x1.pdf]
